# Supplementary material for: Transcriptome Analysis Reveals Key Genes Involved in the Response of Pyrus betuleafolia to Drought and High-Temperature Stress
Source: MDPI journal article supplement (doi:10.3390/plants13020309), 2024-01-20
Supplement: s1 [file s1]

**Supplementary Table S1** The HSPs which response to high-temperature stress in the RNA-seq data.

| Gene ID      | H_9h (FPKM) | H_0h (FPKM) | Annotation                                   |
|--------------|-------------|-------------|----------------------------------------------|
| LOC103927498 | 1338.02     | 0.09        | heat shock protein-like                      |
| LOC103927502 | 10442.51    | 0.91        | heat shock protein-like                      |
| LOC103927503 | 2748.583    | 0.046667    | heat shock protein-like                      |
| LOC103927504 | 3953.337    | 0.21        | heat shock protein-like                      |
| LOC103930915 | 51.42667    | 3.966667    | heat shock protein 70 like                   |
| LOC103930933 | 46.66667    | 15.17333    | heat shock protein 70                        |
| LOC103935290 | 1.7         | 0.486667    | heat shock protein 70 like                   |
| LOC103935982 | 44.31667    | 5.096667    | heat shock protein 70 8-like                 |
| LOC103936175 | 4038.977    | 4.18        | 18.1 kDa class I heat shock protein-like     |
| LOC103936185 | 5237.453    | 10.26       | 18.1 kDa class I heat shock protein-like     |
| LOC103936191 | 954.7133    | 3.016667    | 16.9 kDa class I heat shock protein 2-like   |
| LOC103936199 | 496.8833    | 0.236667    | 18.1 kDa class I heat shock protein-like     |
| LOC103936226 | 10476.14    | 19.18667    | 18.5 kDa class I heat shock protein-like     |
| LOC103940225 | 340.3333    | 7.97        | small heat shock protein, chloroplastic      |
| LOC103942692 | 101.7467    | 11.15667    | 16.9 kDa class I heat shock protein 2-like   |
| LOC103942700 | 9291.43     | 9.456667    | 16.9 kDa class I heat shock protein 2-like,  |
| LOC103942709 | 1024.593    | 1.323333    | 16.9 kDa class I heat shock protein 2-like   |
| LOC103943366 | 7.1         | 0           | small heat shock protein, chloroplastic-like |
| LOC103945001 | 158.97      | 57.5        | stromal 70 kDa heat shock-related protein    |
| LOC103945002 | 263.5467    | 19          | heat shock 70 kDa protein 6                  |
| LOC103945383 | 162.27      | 1.06        | heat shock 70 kDa protein-like               |
| LOC103945384 | 297.4       | 1.223333    | heat shock 70 kDa protein-like               |
| LOC103946362 | 255.1533    | 78.60667    | stromal 70 kDa heat shock-related protein    |
| LOC103946415 | 743.1867    | 0.08        | 16.9 kDa class I heat shock protein 1-like   |
| LOC103946600 | 719.5733    | 167.1167    | heat shock protein 90-5, chloroplastic       |
| LOC103948411 | 436.3167    | 28.61667    | heat shock cognate 70 kDa protein 2          |
| LOC103948601 | 19.47       | 6.506667    | 17.4 kDa class III heat shock protein-like   |
| LOC103948841 | 76.71       | 32.98333    | heat shock 70 kDa protein 15-like            |
| LOC103948842 | 65.77667    | 25.21667    | heat shock 70 kDa protein 15-like            |
| LOC103949050 | 47.88333    | 1.146667    | heat shock 70 kDa protein-like               |
| LOC103949874 | 499.0267    | 0.293333    | small heat shock protein                     |
| LOC103951596 | 2278.11     | 22.08333    | small heat shock protein                     |
| LOC103952262 | 188.5333    | 69.63333    | heat shock protein 90-2                      |
| LOC103952522 | 2921.547    | 0.08        | 17.1 kDa class II heat shock protein-like    |
| LOC103953301 | 115.9933    | 0.13        | 18.1 kDa class I heat shock protein-like     |
| LOC103955091 | 114.8367    | 9.703333    | heat shock protein 90-6, mitochondrial       |
| LOC103955267 | 120.4833    | 0.303333    | 26.5 kDa heat shock protein, mitochondrial   |
| LOC103956001 | 422.8233    | 14.55       | heat shock 70 kDa protein                    |
| LOC103956116 | 92.09333    | 17.04333    | heat shock 70 kDa protein, mitochondrial     |

|              |          |          |                                          |
|--------------|----------|----------|------------------------------------------|
| LOC103956628 | 143.2633 | 1.57     | heat shock 70 kDa protein 8-like         |
| LOC103956927 | 145.2067 | 94       | heat shock protein 90-2                  |
| LOC103957827 | 55.10667 | 20.58    | heat shock 70 kDa protein, mitochondrial |
| LOC103958215 | 628.9533 | 7.32     | heat shock protein 83                    |
| LOC103959434 | 516.5267 | 61.64    | 15.7 kDa heat shock protein              |
| LOC103959693 | 244.7933 | 0        | class I heat shock protein-like          |
| LOC103959824 | 70.30333 | 0.783333 | 23.6 kDa heat shock protein              |
| LOC103959948 | 0.57     | 0        | 15.7 kDa heat shock protein              |
| LOC103960307 | 497.6167 | 0        | 22.0 kDa class IV heat shock protein     |
| LOC103960954 | 333.4667 | 0        | class I heat shock protein-like          |
| LOC103961953 | 77.15    | 0.553333 | 23.6 kDa heat shock protein              |
| LOC103963260 | 125.8533 | 4.67     | 17.6 kDa class I heat shock protein      |
| LOC103964327 | 211.6767 | 0.21     | heat shock protein 83-like               |
| LOC103965881 | 146.2667 | 0        | heat shock 70 kDa protein-like           |
| LOC103966169 | 301.4367 | 0.026667 | heat shock protein 83-like               |
| LOC103966404 | 1.226667 | 6.83     | heat shock 70 kDa protein 18-like        |
| LOC108868142 | 23.53333 | 13.46    | 15.7 kDa heat shock protein              |

**Supplementary Table S2** List of primers used in this study.

| Primer          | Sequence (5'-3')                                         |
|-----------------|----------------------------------------------------------|
| LOC103947119    | F: GTTCGGGGTTTCTGGATGC<br>R: TACTTGGGACGGTGGCAAG         |
| LOC103950596    | F: AAAAAAGATCCGCCAGCGT<br>R: ATCCGGACGCCGTATGATT         |
| LOC103959917    | F: TGTAGAGCAGTCAGCAATGTCCA<br>R: CTATTGACACCAGCAGCAGATGA |
| LOC103946681    | F: AGCAGCGAAAGGTCTTCGA<br>R: TCTCACCAGCCGTTTGGAC         |
| LOC103966009    | F: AACCCCCATGAGATCAACAAGT<br>R: CAACGGTGGAGATATGACTTCG   |
| LOC103960544    | F: GCGAAACCGATAATGTCGC<br>R: GGAGCACGCGTAAGTCGAG         |
| LOC103927985    | F: TGTGGGAGCAAAGGATGGA<br>R: GCAAGCGTTTCTCAGCACC         |
| <i>PbrGAPDH</i> | F: TGGTGTCATGGTTGGTATGG<br>R: CAGGAGCAACACGAAGTTCA       |
